# Supplementary material for: Identification of Crucial Genes and Pathways in Human Arrhythmogenic Right Ventricular Cardiomyopathy by Coexpression Analysis
Source: Front Physiol. 2018 Dec 6;9:1778. doi: 10.3389/fphys.2018.01778 (PMC6291487; doi:10.3389/fphys.2018.01778)
Supplement: TABLE S2 — DEGs in WGCNA modules. [file Table_2.XLSX]

## Sheet: Sheet1
Genes	moduleColor	MM.turquoise	p.MM.turquoise	MM.blue	p.MM.blue	MM.brown	p.MM.brown	MM.grey	p.MM.grey
CD14	blue	0.852578	1.22519e-07	0.950207	1.27577e-12	-0.780232	6.90929e-06	-0.36072	0.083332
LDHA	blue	0.915064	3.84506e-10	0.925971	8.92847e-11	-0.773174	9.43919e-06	-0.259371	0.220989
CCR1	blue	0.890226	5.73887e-09	0.953923	5.53154e-13	-0.725884	5.94688e-05	-0.299423	0.155195
FCER1G	blue	0.829845	5.30626e-07	0.944624	4.00013e-12	-0.780239	6.90705e-06	-0.245993	0.24658
PLSCR1	blue	0.883352	1.08291e-08	0.886446	8.17796e-09	-0.723474	6.46659e-05	-0.327886	0.117781
IL18BP	blue	0.810777	1.55283e-06	0.86581	4.64501e-08	-0.766452	1.2578e-05	-0.243716	0.251122
FCGR1B	blue	0.804052	2.20482e-06	0.89908	2.37416e-09	-0.573886	0.00336492	-0.392085	0.0580985
SERPINA3	blue	0.80856	1.74567e-06	0.81894	9.95625e-07	-0.551303	0.0052325	-0.422625	0.0396436
PLA2G2A	blue	0.805136	2.08562e-06	0.895588	3.39446e-09	-0.660395	0.000444624	-0.21179	0.320468
MID1IP1	blue	0.822899	7.96184e-07	0.838748	3.0699e-07	-0.77104	1.03506e-05	-0.303637	0.149185
IFI30	blue	0.77375	9.20553e-06	0.916	3.4189e-10	-0.637063	0.000814606	-0.149754	0.484907
UCP2	blue	0.734592	4.36139e-05	0.868114	3.88235e-08	-0.661768	0.000428383	-0.19601	0.358652
ADAP2	blue	0.816644	1.13068e-06	0.829687	5.35645e-07	-0.660314	0.000445608	-0.222775	0.295407
GAS2L3	blue	0.708634	0.000106377	0.838796	3.06059e-07	-0.627543	0.00102859	-0.406475	0.0487173
LY96	blue	0.744229	3.0514e-05	0.893939	4.00104e-09	-0.512839	0.0103895	-0.257936	0.223647
CDKN3	blue	0.772234	9.83153e-06	0.811361	1.50523e-06	-0.630193	0.000964667	-0.341308	0.102628
CTSC	blue	0.785419	5.4538e-06	0.876401	1.97936e-08	-0.568626	0.00373969	-0.220074	0.301453
VMP1	blue	0.74694	2.75191e-05	0.829177	5.52178e-07	-0.553841	0.0049868	-0.387867	0.0610967
FCGR1CP	blue	0.713125	9.17937e-05	0.862138	6.14005e-08	-0.517948	0.00952703	-0.343943	0.0998318
C4B_2	blue	0.750482	2.39991e-05	0.856484	9.29417e-08	-0.59087	0.0023638	-0.162266	0.448724
S100A9	blue	0.766203	1.27106e-05	0.765674	1.29953e-05	-0.692141	0.00017878	-0.134599	0.530619
EMP3	blue	0.707845	0.000109139	0.776858	8.03164e-06	-0.586178	0.002611	-0.133749	0.533243
LOC101926921	blue	0.710029	0.000101644	0.90876	8.20213e-10	-0.612918	0.00145084	-0.21893	0.304036
S100A11	blue	0.823733	7.58991e-07	0.814239	1.28941e-06	-0.493942	0.0141597	-0.166872	0.435774
GBAP1	blue	0.704034	0.000123374	0.807387	1.85615e-06	-0.633039	0.000899844	-0.235135	0.268717
RNASE2	blue	0.650365	0.000580375	0.738969	3.71529e-05	-0.575719	0.003242	-0.376167	0.0700383
MOG	blue	0.783702	5.90218e-06	0.754495	2.04952e-05	-0.503143	0.0122042	-0.137476	0.521789
CD248	blue	0.72974	5.19134e-05	0.708719	0.000106082	-0.644995	0.000666775	-0.0876636	0.683772
F13A1	blue	0.632502	0.000911789	0.869391	3.50999e-08	-0.637679	0.000802194	-0.127777	0.551839
TIMP1	blue	0.715655	8.43775e-05	0.767674	1.19469e-05	-0.377754	0.06877	-0.224152	0.292355
ZNF208	blue	-0.661703	0.000429147	-0.708447	0.000107027	0.59748	0.00204948	0.46721	0.0213418
LOC100505501	blue	0.635013	0.000857124	0.68583	0.000216168	-0.613102	0.00144471	-0.198087	0.353482
HIST1H2AK	blue	-0.519136	0.00933527	-0.736941	4.00329e-05	0.672337	0.000319624	0.267643	0.206086
IL4R	blue	0.69005	0.000190488	0.72837	5.44953e-05	-0.594478	0.00218751	-0.183261	0.391358
UPK3B	blue	-0.626487	0.00105504	-0.60991	0.00155398	0.597013	0.00207045	0.390216	0.0594122
LTF	blue	0.6152	0.00137653	0.648919	0.000602618	-0.668797	0.000353013	-0.29012	0.169067
CXCL14	blue	0.714653	8.72492e-05	0.724594	6.22032e-05	-0.63973	0.000762025	-0.08711	0.685669
FCGR2A	blue	0.665428	0.000387564	0.852592	1.22401e-07	-0.5139	0.0102053	-0.242581	0.253404
TNNT1	blue	-0.656092	0.00049906	-0.716809	8.11726e-05	0.561066	0.00433969	0.207738	0.330029
CD209	blue	0.693513	0.000171442	0.799926	2.7161e-06	-0.570532	0.00360006	-0.07423	0.730309
AIF1	blue	0.582682	0.00280917	0.849749	1.48935e-07	-0.53559	0.00699107	-0.248871	0.240919
CCL19	blue	0.687624	0.000204903	0.709729	0.000102648	-0.447042	0.0285123	-0.35384	0.0898296
LOC101927143	blue	-0.631115	0.000943241	-0.645659	0.000655522	0.642311	0.000713958	0.352302	0.0913322
CXCL10	blue	0.589053	0.00245704	0.759628	1.66762e-05	-0.669001	0.000351006	-0.305681	0.14633
THAP3	blue	-0.608055	0.00162069	-0.750103	2.43557e-05	0.515596	0.0099165	0.416934	0.0426742
C1orf105	blue	0.540965	0.00634116	0.736038	4.13786e-05	-0.674267	0.000302599	-0.0893743	0.677921
NCF4	blue	0.636871	0.000818515	0.708706	0.000106128	-0.582447	0.00282293	-0.2453	0.247956
FAM43B	blue	0.67561	0.000291225	0.711815	9.58546e-05	-0.467077	0.021384	-0.266849	0.207487
PRKCD	blue	0.570015	0.00363747	0.569171	0.00369932	-0.55073	0.00528937	-0.461877	0.0230778
ALDH1A3	blue	0.75189	2.27133e-05	0.775777	8.42402e-06	-0.433492	0.0343287	-0.00313077	0.988416
CYP1B1	blue	0.718021	7.79214e-05	0.763502	1.42252e-05	-0.362612	0.0816091	-0.0557774	0.795738
SPC24	blue	0.624039	0.00111866	0.79455	3.53937e-06	-0.500178	0.0128083	-0.110025	0.608796
ZNF135	blue	0.542837	0.00612701	0.575363	0.00326559	-0.530837	0.00761112	-0.369445	0.0756083
SLC39A12	blue	0.562803	0.00419511	0.621541	0.00118695	-0.512706	0.0104128	-0.346901	0.0967588
CXCL1	blue	0.62518	0.00108862	0.724584	6.22242e-05	-0.565338	0.00399138	-0.077273	0.719679
EMILIN1	blue	0.56396	0.00410106	0.653682	0.000531979	-0.332729	0.112136	-0.43928	0.0317386
TNFSF13B	blue	0.553679	0.0050022	0.845452	1.98875e-07	-0.544444	0.00594806	-0.0280128	0.896619
LMNB1	blue	0.533386	0.00727312	0.608509	0.00160412	-0.510951	0.0107241	-0.0268581	0.90086
TK1	blue	0.610074	0.00154821	0.67704	0.00027952	-0.321199	0.12591	-0.402981	0.0508779
FCGBP	blue	0.504983	0.011841	0.731126	4.94126e-05	-0.477641	0.018252	-0.068521	0.750381
CSF2RB	blue	0.663553	0.000408034	0.688225	0.000201251	-0.517874	0.00953911	-0.214589	0.313964
GAS5-AS1	blue	-0.529354	0.00781378	-0.627565	0.00102805	0.628913	0.000995111	0.208216	0.328891
EMILIN3	blue	-0.641597	0.000726999	-0.69699	0.00015401	0.435678	0.0333317	0.100168	0.64143
CCL13	blue	0.573939	0.00336132	0.705059	0.000119395	-0.507629	0.0113346	-0.161426	0.45111
LINC01020	blue	0.535332	0.00702353	0.540482	0.00639731	-0.47953	0.0177336	-0.200856	0.346653
CDHR1	blue	-0.586313	0.00260357	-0.712629	9.33153e-05	0.506276	0.0115913	0.0380718	0.859807
GAS1RR	blue	0.552229	0.00514168	0.599268	0.00197082	-0.407756	0.0479431	-0.402038	0.0514736
LENG9	blue	-0.462766	0.0227806	-0.561417	0.00431014	0.500441	0.0127537	0.279595	0.185776
IGFLR1	blue	0.598764	0.00199272	0.771629	1.00912e-05	-0.540353	0.00641241	-0.0490925	0.819801
GPR82	blue	-0.570868	0.00357585	-0.699919	0.000140548	0.490326	0.0149955	0.226422	0.287366
LOC102724788	blue	-0.596757	0.00208199	-0.701851	0.000132242	0.530465	0.00766159	-0.0275916	0.898166
KCNQ2	blue	0.500402	0.0127618	0.625663	0.0010761	-0.389875	0.0596546	-0.271948	0.198605
HMOX1	blue	0.604762	0.0017451	0.625625	0.00107709	-0.414259	0.0441605	-0.0557333	0.795896
CALR3	blue	-0.503084	0.0122158	-0.558269	0.00458122	0.419107	0.0414961	0.423888	0.0389943
INSL4	blue	-0.446396	0.0287703	-0.549053	0.00545884	0.479614	0.0177107	0.306502	0.145194
LOC100507443	blue	-0.51634	0.00979179	-0.577891	0.00310136	0.586821	0.0025759	0.334433	0.110198
TAAR8	blue	-0.591393	0.00233752	-0.511991	0.0105388	0.552469	0.00511843	0.286529	0.174644
BEX5	blue	0.491641	0.0146871	0.650336	0.000580814	-0.498676	0.0131238	-0.337555	0.106712
C4orf48	blue	0.570411	0.00360873	0.697362	0.000152238	-0.405244	0.0494701	-0.185651	0.385101
FJX1	blue	0.658412	0.000469035	0.682473	0.000238708	-0.404536	0.0499069	-0.218903	0.304098
LYVE1	blue	0.552756	0.00509058	0.635887	0.000838771	-0.585301	0.00265956	-0.122541	0.568384
LINC01428	blue	-0.634506	0.000867924	-0.64841	0.000610624	0.388822	0.0604077	0.224849	0.290818
VENTX	blue	0.429359	0.036279	0.514905	0.0100332	-0.541214	0.00631226	-0.418027	0.0420786
P2RY6	blue	0.565374	0.00398858	0.61785	0.00129438	-0.44735	0.0283899	-0.349576	0.0940426
NUP50-AS1	blue	0.542638	0.00614943	0.671938	0.00032324	-0.505945	0.0116549	-0.157688	0.461796
HK3	blue	0.587469	0.00254092	0.637742	0.000800937	-0.467362	0.0212941	-0.13224	0.537914
CCL18	blue	0.550508	0.00531155	0.814691	1.25814e-06	-0.486761	0.0158584	0.0335921	0.876171
ZNF674-AS1	blue	0.508496	0.0111727	0.555033	0.00487478	-0.381047	0.0661948	-0.535752	0.00697067
GRASP	blue	-0.569623	0.00366606	-0.601041	0.0018954	0.442069	0.0305475	0.34448	0.0992678
HBA2	blue	-0.365835	0.0787351	-0.715602	8.45272e-05	0.356969	0.0868288	0.220792	0.299838
PATL2	blue	0.446968	0.0285416	0.569337	0.0036871	-0.58362	0.00275476	-0.14314	0.504608
GRIK4	blue	-0.495963	0.0137096	-0.648257	0.00061305	0.413366	0.0446656	0.493248	0.0143171
HBB	blue	-0.370417	0.0747832	-0.730531	5.04735e-05	0.34048	0.103519	0.258463	0.222669
LPCAT1	blue	0.560736	0.00436756	0.585267	0.00266144	-0.509302	0.0110237	0.0392911	0.855362
NEU4	blue	-0.478677	0.0179662	-0.675969	0.000288248	0.503077	0.0122173	0.384537	0.063547
BLNK	blue	0.556456	0.00474381	0.621244	0.0011953	-0.446735	0.0286345	-0.282042	0.181792
CCL8	blue	0.538254	0.00666229	0.769961	1.08401e-05	-0.435066	0.0336082	-0.173421	0.417711
ARNTL2	blue	0.515609	0.00991418	0.644241	0.000679751	-0.440054	0.0314046	-0.0711482	0.741124
IGSF6	blue	0.422286	0.039819	0.738805	3.7379e-05	-0.482973	0.0168195	-0.230047	0.279511
RAB38	blue	0.499011	0.0130529	0.601828	0.00186274	-0.4003	0.0525862	-0.110682	0.606645
C11orf65	blue	-0.462744	0.0227879	-0.586482	0.00259434	0.583423	0.00276613	0.0392443	0.855533
NRTN	blue	0.449138	0.0276877	0.534826	0.00708774	-0.5123	0.0104843	-0.157701	0.461757
DIO3OS	blue	-0.447523	0.0283212	-0.559327	0.00448856	0.328901	0.11658	0.372088	0.0733796
DAB1-AS1	blue	0.455007	0.0254797	0.463957	0.0223876	-0.491259	0.014776	-0.54514	0.00587181
GALNT6	blue	0.402736	0.0510325	0.565942	0.00394414	-0.517856	0.00954208	-0.347567	0.0960779
LILRB2	blue	0.470303	0.0203847	0.672547	0.00031773	-0.547807	0.0055876	-0.134249	0.5317
ZFP57	blue	0.368078	0.0767813	0.467739	0.0211757	-0.456027	0.0251111	-0.250969	0.236846
TRPM2-AS	blue	-0.504815	0.0118739	-0.544248	0.00596955	0.309817	0.140671	0.479665	0.017697
LINC01268	blue	0.496982	0.013487	0.542767	0.00613484	-0.307272	0.144134	-0.399356	0.0531977
CXCR2	blue	-0.397643	0.0543223	-0.574057	0.00335333	0.467242	0.0213318	0.275432	0.192686
LGALS9	blue	0.487191	0.0157522	0.584783	0.00268861	-0.383867	0.0640488	-0.0171216	0.93671
LINC01492	blue	-0.507257	0.0114048	-0.587678	0.00252971	0.318416	0.129412	0.589005	0.00245958
NCKAP5	blue	-0.443799	0.0298266	-0.504294	0.011976	0.499572	0.0129349	0.262136	0.215931
PRKAG3	blue	0.429789	0.0360722	0.62736	0.00103313	-0.515221	0.00997969	-0.0337903	0.875446
PRDM13	blue	0.438425	0.0321114	0.528343	0.00795434	-0.392604	0.0577372	-0.126709	0.555196
SLC2A4	blue	-0.548404	0.00552553	-0.646993	0.000633401	0.372461	0.0730691	0.239747	0.259164
LINC00242	blue	0.422774	0.0395662	0.524997	0.0084351	-0.514493	0.0101035	-0.140697	0.511985
LILRB5	blue	0.47406	0.0192689	0.631624	0.000931583	-0.41879	0.0416667	-0.305146	0.147074
ANKZF1	blue	-0.348215	0.0954173	-0.459383	0.0239277	0.386166	0.062339	0.494827	0.013961
LOC101927766	blue	-0.399123	0.0533501	-0.462917	0.0227307	0.531673	0.0074988	0.168314	0.43176
ST8SIA2	blue	-0.448816	0.0278129	-0.526578	0.00820506	0.558216	0.00458588	-0.151012	0.481205
SYNGR3	blue	0.434026	0.034083	0.454793	0.0255578	-0.48811	0.0155273	-0.549279	0.00543569
LOC653602	blue	0.448811	0.0278151	0.535338	0.00702284	-0.289531	0.169973	-0.453845	0.0259053
LOC102723927	blue	-0.493035	0.0143657	-0.547118	0.00565987	0.492862	0.0144052	0.245834	0.246897
SHISA3	blue	-0.542226	0.00619619	-0.683963	0.000228462	0.336102	0.108324	0.00466446	0.982742
DSC1	blue	-0.474432	0.0191612	-0.581905	0.0028549	0.394217	0.0566268	0.204899	0.336828
GNG13	blue	0.43562	0.0333578	0.659083	0.000460653	-0.291486	0.166977	-0.436168	0.0331113
EFNB1	blue	-0.547425	0.00562756	-0.551106	0.00525204	0.367344	0.0774164	0.42835	0.0367682
HCK	blue	0.420377	0.0408195	0.656725	0.000490709	-0.460712	0.0234717	-0.0749632	0.727744
MYO1H	blue	0.394032	0.0567533	0.503605	0.012112	-0.383615	0.0642387	-0.154363	0.47141
LINC00615	blue	-0.379631	0.0672932	-0.475754	0.0187822	0.333972	0.11072	0.437117	0.0326878
PALM3	blue	-0.43782	0.032377	-0.496292	0.0136374	0.456239	0.025035	0.536555	0.00687039
LPIN3	blue	0.478066	0.0181344	0.501974	0.0124394	-0.457394	0.0246236	-0.293609	0.163766
LOC101928317	blue	-0.464068	0.0223513	-0.522318	0.0088372	0.413307	0.0446994	0.274603	0.194083
TPX2	blue	0.452862	0.0262699	0.495398	0.0138343	-0.299743	0.154734	-0.0396049	0.854219
OR7A17	blue	-0.371647	0.0737483	-0.426492	0.0376826	0.442776	0.0302512	0.195898	0.358932
SLC2A6	blue	0.448493	0.0279394	0.560343	0.00440106	-0.405028	0.0496034	-0.140925	0.511293
LOC105378732	blue	-0.392989	0.0574705	-0.500089	0.0128269	0.498207	0.0132234	0.146994	0.493082
SCGN	blue	-0.497023	0.0134781	-0.511238	0.0106728	0.411946	0.0454779	0.121497	0.571706
ALLC	blue	-0.384986	0.0632123	-0.560019	0.00442879	0.517315	0.00963059	0.139809	0.51468
LINC00943	blue	-0.324921	0.121337	-0.46086	0.0234214	0.413788	0.0444265	0.231664	0.276052
SPP1	blue	0.519628	0.00925678	0.641319	0.000732111	-0.0893537	0.677991	-0.183358	0.391103
ENPP6	blue	0.432399	0.0348365	0.513128	0.010339	-0.449039	0.0277262	-0.0236463	0.912668
CHEK2	blue	0.488401	0.0154565	0.556283	0.00475956	-0.215273	0.312386	-0.0637342	0.767333
CD81-AS1	blue	0.396317	0.0552052	0.463195	0.0226384	-0.371324	0.0740187	-0.506813	0.0114889
FAM83F	blue	0.462274	0.0229447	0.545563	0.00582593	-0.302842	0.150306	-0.405032	0.0496005
MIR155	blue	0.455117	0.0254399	0.552989	0.00506819	-0.236792	0.265258	-0.174934	0.413597
KCNS1	blue	-0.4223	0.039812	-0.502163	0.0124012	0.396971	0.0547686	0.174352	0.415177
LOC283922	blue	-0.378678	0.0680401	-0.53489	0.00707955	0.487176	0.0157559	0.100007	0.641971
DLGAP1-AS3	blue	-0.467895	0.0211269	-0.576883	0.00316594	0.180112	0.399688	0.0200153	0.92604
PPM1E	blue	-0.369404	0.0756437	-0.438118	0.032246	0.424492	0.0386871	0.263431	0.213587
HPGDS	blue	0.309176	0.141538	0.576098	0.00321708	-0.545615	0.00582036	-0.019113	0.929365
TAS2R5	blue	-0.330122	0.115149	-0.437315	0.0325998	0.345465	0.0982422	0.2309	0.277682
VN1R2	blue	0.458204	0.0243381	0.439823	0.031504	-0.299638	0.154886	-0.306704	0.144915
LOC101930303	blue	-0.379432	0.0674488	-0.599987	0.00193997	0.383878	0.0640402	0.169564	0.428299
LOC401585	blue	-0.431115	0.03544	-0.495172	0.0138844	0.370067	0.0750795	0.0133428	0.950659
LOC100996583	blue	-0.394564	0.0563899	-0.551647	0.00519861	0.25844	0.222711	0.061665	0.774694
FBXO39	blue	0.328433	0.117132	0.395826	0.0555356	-0.358879	0.0850347	-0.316736	0.131558
LINC01197	blue	0.39227	0.0579695	0.414383	0.0440909	-0.126031	0.55733	-0.508964	0.0110859
C14orf39	blue	0.329034	0.116424	0.480163	0.0175626	-0.340926	0.103038	0.0220498	0.918545
POMK	blue	0.361457	0.082657	0.399412	0.0531618	-0.348642	0.094984	-0.273041	0.196735
CLEC4G	blue	0.48419	0.0165057	0.548029	0.00556446	-0.331723	0.113292	0.0819953	0.703284
MELK	blue	0.25963	0.220512	0.511726	0.0105858	-0.341528	0.102392	-0.0322916	0.880931
ADRA2A	blue	0.431854	0.0350915	0.572186	0.00348242	-0.333698	0.111031	0.0603995	0.779205
CCDC144CP	blue	-0.265942	0.209094	-0.347083	0.0965727	0.192917	0.366436	0.291129	0.167522
ADRB1	brown	0.801809	2.47106e-06	0.809346	1.67496e-06	-0.892009	4.83409e-09	-0.422796	0.0395552
S1PR3	brown	0.789754	4.45339e-06	0.851471	1.32316e-07	-0.871653	2.9284e-08	-0.322003	0.124912
SEMA4B	brown	0.857796	8.45505e-08	0.738786	3.74045e-05	-0.850346	1.42972e-07	-0.40003	0.0527603
OMD	brown	-0.825678	6.78292e-07	-0.755208	1.99222e-05	0.904925	1.26668e-09	0.250706	0.237354
B3GNT7	brown	0.822862	7.97839e-07	0.734417	4.38911e-05	-0.824703	7.1775e-07	-0.278436	0.187683
FAM161A	brown	-0.756945	1.85857e-05	-0.808699	1.73296e-06	0.831527	4.79668e-07	0.122976	0.567
CMPK2	brown	0.707146	0.000111637	0.693624	0.00017086	-0.88339	1.0792e-08	-0.448949	0.0277613
FIBIN	brown	-0.801393	2.52343e-06	-0.667584	0.000365132	0.895047	3.58363e-09	0.262447	0.215366
MTURN	brown	-0.74127	3.41071e-05	-0.745447	2.91342e-05	0.87274	2.68079e-08	0.206069	0.334015
FRZB	brown	-0.728428	5.43837e-05	-0.688166	0.000201607	0.879327	1.54253e-08	0.168516	0.431199
MARCH11	brown	0.605667	0.00171013	0.729991	5.14526e-05	-0.792643	3.88052e-06	-0.3218	0.125164
JAK2	brown	-0.644373	0.000677457	-0.693448	0.000171783	0.853145	1.1776e-07	0.331684	0.113337
KCNIP2	brown	0.661304	0.000433811	0.648832	0.000603985	-0.876462	1.96919e-08	-0.288947	0.170874
SMTNL2	brown	0.66273	0.00041731	0.75952	1.67499e-05	-0.842323	2.4415e-07	-0.203819	0.339435
SLC16A9	brown	-0.713354	9.11021e-05	-0.536344	0.00689659	0.81809	1.04384e-06	0.313948	0.135178
GLT8D2	brown	-0.772532	9.70553e-06	-0.557964	0.00460827	0.745577	2.89908e-05	0.264071	0.212436
FAM179A	brown	0.686308	0.00021312	0.594579	0.00218273	-0.824419	7.29604e-07	-0.257995	0.223537
LOC152048	brown	-0.630886	0.00094852	-0.68306	0.000234625	0.789254	4.5597e-06	0.029673	0.890527
CA14	brown	0.648459	0.000609861	0.611068	0.00151358	-0.800053	2.69891e-06	-0.238161	0.262424
PHLDA1	brown	-0.69701	0.000153914	-0.50738	0.0113816	0.744403	3.03137e-05	0.156841	0.464234
LTBP2	brown	-0.648255	0.000613093	-0.669523	0.000345931	0.860137	7.12509e-08	0.0392901	0.855366
COL8A1	brown	-0.623633	0.00112954	-0.508004	0.0112643	0.861722	6.33408e-08	0.319715	0.127768
ACE2	brown	-0.672699	0.000316368	-0.578453	0.0030658	0.839168	2.9892e-07	0.29367	0.163676
AQP4	brown	0.661966	0.000426081	0.575978	0.00322494	-0.738534	3.77542e-05	-0.22313	0.29462
CTGF	brown	-0.705092	0.000119267	-0.501936	0.0124471	0.82049	9.1275e-07	0.273315	0.196268
LCP1	brown	0.610498	0.00153335	0.741203	3.41921e-05	-0.690136	0.000189992	-0.0998315	0.642557
NRARP	brown	0.721391	6.9475e-05	0.51448	0.0101058	-0.738038	3.84517e-05	-0.17911	0.402359
C3	brown	0.637858	0.000798626	0.71492	8.64753e-05	-0.756687	1.87791e-05	0.0517717	0.810137
CORO1A	brown	0.545893	0.00579043	0.730522	5.04891e-05	-0.691212	0.000183902	0.0141545	0.947661
SFRP4	brown	-0.616663	0.00133065	-0.446715	0.0286428	0.824811	7.13283e-07	0.202273	0.343191
ARRDC3	brown	-0.467541	0.0212377	-0.431075	0.0354589	0.640378	0.000749704	0.195589	0.359707
DNM1	brown	0.471789	0.0199374	0.555887	0.00479577	-0.628524	0.00100452	-0.14583	0.49655
NPPA	brown	-0.603643	0.00178918	-0.444202	0.0296606	0.790797	4.23838e-06	0.084438	0.694852
CHRDL2	brown	0.671464	0.000327591	0.548595	0.00550589	-0.739065	3.7021e-05	-0.124209	0.563089
ANKRD1	brown	-0.425886	0.0379845	-0.538652	0.00661432	0.616587	0.00133299	0.453945	0.0258687
LPCAT4	brown	0.465983	0.0217315	0.60932	0.00157494	-0.755124	1.99893e-05	-0.092564	0.66706
APOA1	brown	-0.531283	0.00755109	-0.4222	0.0398638	0.75332	2.14709e-05	0.199079	0.351026
DHRS7C	brown	0.51675	0.00972381	0.489994	0.0150742	-0.736035	4.1382e-05	-0.137219	0.522575
MFAP4	brown	-0.529208	0.0078339	-0.463117	0.0226642	0.731282	4.91371e-05	-0.01624	0.939962
NPPB	brown	-0.48787	0.0155858	-0.455697	0.0252298	0.800114	2.69069e-06	0.18035	0.399055
ZMYND19	brown	0.458366	0.0242816	0.507267	0.0114029	-0.699921	0.00014054	-0.269497	0.202842
CHGA	brown	0.504358	0.0119634	0.348339	0.0952913	-0.607024	0.00165878	-0.0827422	0.700702
FBXW8	brown	-0.456973	0.0247729	-0.543147	0.00609209	0.635021	0.000856953	0.354869	0.0888338
LOC101559451	brown	-0.464693	0.0221476	-0.498295	0.0132047	0.656932	0.000487997	0.212893	0.317896
ASPN	brown	-0.622568	0.00115846	-0.392964	0.057488	0.711829	9.58118e-05	0.0597838	0.781402
FIGLA	brown	0.487526	0.0156698	0.399355	0.0531989	-0.670331	0.000338185	-0.0254422	0.906063
FNDC1	brown	-0.413572	0.0445487	-0.525369	0.00838045	0.517404	0.00961592	0.282674	0.180775
SLFNL1-AS1	brown	0.436261	0.0330694	0.37219	0.0732947	-0.647046	0.000632544	-0.353303	0.0903519
Dbpht2	brown	0.38649	0.0621012	0.422005	0.0399651	-0.498206	0.0132237	-0.269715	0.202461
CCDC189	brown	0.511088	0.0106995	0.502002	0.0124339	-0.644581	0.000673858	-0.132551	0.536949
LOC105379499	brown	-0.471526	0.0200157	-0.457648	0.0245338	0.586893	0.00257198	0.0479684	0.823863
SEC14L5	brown	0.302219	0.151189	0.51431	0.0101349	-0.651709	0.00056032	-0.240266	0.258102
PLA2G2F	brown	0.408993	0.0472045	0.282092	0.181713	-0.594557	0.00218375	-0.222367	0.296316
TMEM175	brown	-0.353271	0.0903836	-0.427298	0.0372837	0.538738	0.00660391	0.281764	0.182243
LOC101929572	brown	0.421244	0.0403626	0.43957	0.031613	-0.578189	0.00308241	-0.139248	0.516383
SERPINA5	brown	0.362528	0.0816848	0.464481	0.0222165	-0.675757	0.000289998	-0.0519385	0.809536
CCL3L3	brown	-0.435735	0.0333061	-0.216551	0.309454	0.55105	0.0052576	0.172904	0.419121
LOC100133131	brown	-0.417664	0.0422759	-0.307283	0.144119	0.542044	0.00621689	0.0618	0.774213
ELANE	brown	0.313059	0.136347	0.301197	0.152645	-0.556776	0.00471472	-0.201215	0.345775
TAF1A-AS1	brown	-0.423098	0.0393993	-0.301302	0.152495	0.583137	0.00278268	0.319994	0.127419
C14orf132	brown	-0.418865	0.0416261	-0.387249	0.0615456	0.607098	0.00165603	0.401056	0.0521
P3H2	brown	-0.421436	0.0402623	-0.357427	0.0863961	0.756343	1.90399e-05	-0.0365367	0.865409
FAM95A	brown	-0.435288	0.0335077	-0.318083	0.129835	0.531539	0.00751676	0.49414	0.0141152
SLITRK4	brown	-0.357501	0.0863267	-0.365585	0.0789556	0.523645	0.00863604	0.393058	0.057423
XAGE2	brown	0.418032	0.0420757	0.310764	0.139399	-0.568558	0.0037448	-0.275842	0.191998
NPAP1	brown	-0.371743	0.073668	-0.330954	0.114181	0.597555	0.00204611	-0.056627	0.792693
GNMT	brown	0.307834	0.143365	0.328273	0.117322	-0.69314	0.000173409	-0.207001	0.331785
TEX29	brown	0.335881	0.10857	0.428485	0.0367024	-0.422724	0.0395919	-0.331195	0.113902
LOC100132731	brown	-0.413301	0.0447024	-0.451217	0.0268888	0.59544	0.00214243	0.183067	0.391867
LINC00208	brown	0.406416	0.048753	0.375958	0.0702065	-0.539547	0.00650745	-0.215504	0.311855
LINC00924	brown	0.476146	0.0186712	0.413564	0.0445533	-0.614491	0.00139927	-0.169933	0.427279
SCGB1D2	brown	0.312114	0.137598	0.365622	0.0789224	-0.463219	0.0226307	-0.420376	0.0408204
NKG7	brown	-0.386253	0.0622747	-0.393952	0.0568078	0.453492	0.0260356	0.295545	0.160876
LINC00163	brown	-0.417585	0.0423188	-0.279557	0.185837	0.451146	0.0269156	0.412352	0.0452444
BBOX1	brown	-0.374048	0.0717596	-0.312893	0.136566	0.447098	0.0284901	0.273186	0.196488
LOC100507560	brown	0.352543	0.0910957	0.411474	0.0457509	-0.567284	0.0038408	0.0173108	0.936012
SEC14L1P1	brown	-0.364433	0.0799758	-0.373578	0.0721451	0.574104	0.00335009	-0.0967631	0.65286
LOC101928668	brown	-0.349645	0.0939732	-0.372136	0.07334	0.49859	0.0131421	0.225714	0.288917
EXTL1	brown	0.434686	0.0337814	0.355715	0.0880221	-0.627865	0.00102062	-0.00178369	0.9934
LOC101928510	brown	-0.344928	0.0988002	-0.369431	0.0756205	0.421292	0.0403378	0.509291	0.0110257
ANKRD30B	brown	-0.452002	0.0265919	-0.329924	0.115381	0.582786	0.00280307	0.231054	0.277352
LOC105372255	brown	0.350321	0.0932954	0.304581	0.147861	-0.361502	0.0826166	-0.490172	0.0150318
COMP	brown	-0.403444	0.0505875	-0.217713	0.306799	0.542837	0.00612702	0.241799	0.254985
RNF182	brown	-0.236637	0.26558	-0.41081	0.0461363	0.516487	0.0097674	-0.0635579	0.76796
LINC00645	brown	0.349712	0.0939058	0.405194	0.049501	-0.524834	0.00845904	0.128645	0.549117
SYNPR	brown	0.355079	0.0886326	0.256229	0.226834	-0.442403	0.0304071	-0.237018	0.264789
TNNI1	brown	-0.363226	0.081055	-0.237195	0.264422	0.493356	0.0142926	0.119666	0.57756
EPN2-AS1	grey	-0.372051	0.0734105	-0.275228	0.193029	0.324031	0.122419	0.827122	6.23447e-07
L3MBTL4-AS1	grey	-0.365785	0.0787794	-0.277999	0.188405	0.159582	0.456365	0.827122	6.23447e-07
CCL2	turquoise	0.951706	9.18005e-13	0.872079	2.82901e-08	-0.798475	2.91964e-06	-0.400686	0.0523374
SLCO5A1	turquoise	0.941017	7.87413e-12	0.875811	2.07985e-08	-0.711736	9.61051e-05	-0.332648	0.112229
CCL11	turquoise	0.889377	6.22065e-09	0.84531	2.00754e-07	-0.839279	2.96815e-07	-0.385357	0.0629367
PIK3R1	turquoise	-0.974682	8.39889e-16	-0.808819	1.72207e-06	0.740904	3.45757e-05	0.387219	0.0615678
KCNJ8	turquoise	0.889126	6.37034e-09	0.866213	4.50244e-08	-0.708869	0.000105565	-0.358712	0.0851902
FOXO3B	turquoise	-0.921678	1.62659e-10	-0.75906	1.70654e-05	0.759124	1.70214e-05	0.415507	0.043462
CPEB4	turquoise	-0.822919	7.9526e-07	-0.796663	3.1925e-06	0.828174	5.85982e-07	0.44886	0.0277959
SCN2B	turquoise	-0.792703	3.86931e-06	-0.729035	5.32282e-05	0.798088	2.97607e-06	0.337787	0.106455
TSC22D3	turquoise	-0.936261	1.80701e-11	-0.789953	4.41159e-06	0.762956	1.45504e-05	0.392128	0.0580683
OSMR	turquoise	0.898221	2.59561e-09	0.829775	5.32842e-07	-0.718541	7.65619e-05	-0.287543	0.173058
PLAU	turquoise	0.927281	7.38255e-11	0.829084	5.55244e-07	-0.724724	6.1922e-05	-0.346773	0.0968908
RBM20	turquoise	-0.933956	2.64222e-11	-0.81602	1.17011e-06	0.652621	0.000547065	0.355605	0.0881278
MAMDC2	turquoise	-0.91499	3.881e-10	-0.773602	9.26487e-06	0.706844	0.00011273	0.380759	0.0664172
IGFBP3	turquoise	-0.83925	2.97376e-07	-0.70639	0.000114393	0.718496	7.66801e-05	0.472567	0.0197061
FAM167B	turquoise	0.805026	2.09742e-06	0.790484	4.302e-06	-0.67356	0.000308739	-0.477136	0.0183927
CDCA2	turquoise	0.8319	4.68979e-07	0.775442	8.54884e-06	-0.732974	4.62423e-05	-0.441568	0.0307589
NAP1L3	turquoise	-0.858336	8.13045e-08	-0.691083	0.00018462	0.819933	9.4179e-07	0.259234	0.221242
STAT3	turquoise	0.910996	6.30923e-10	0.781833	6.42713e-06	-0.72521	6.08834e-05	-0.286565	0.174588
MIR100HG	turquoise	-0.822286	8.24475e-07	-0.714578	8.74694e-05	0.756054	1.92609e-05	0.402636	0.051095
CCNG2	turquoise	-0.900946	1.95096e-09	-0.680857	0.000250267	0.771753	1.00377e-05	0.436376	0.0330179
MIR8085	turquoise	0.9223	1.49429e-10	0.792219	3.9603e-06	-0.716342	8.24561e-05	-0.39885	0.0535279
FOXO3	turquoise	-0.891457	5.09927e-09	-0.730875	4.98572e-05	0.711405	9.71586e-05	0.411271	0.0458684
LIFR	turquoise	-0.895795	3.32446e-09	-0.765699	1.29818e-05	0.666921	0.000371906	0.394475	0.0564504
BMP2	turquoise	-0.854546	1.0671e-07	-0.657477	0.000480946	0.685584	0.000217756	0.523317	0.00868532
C11orf96	turquoise	0.918049	2.63143e-10	0.802092	2.43587e-06	-0.656235	0.000497156	-0.389733	0.0597561
PLP2	turquoise	0.832487	4.52578e-07	0.879699	1.49363e-08	-0.616382	0.00133935	-0.255536	0.228137
LOC101928877	turquoise	-0.708252	0.000107706	-0.687984	0.000202705	0.762308	1.49441e-05	0.58077	0.00292285
FPR1	turquoise	0.845867	1.93465e-07	0.768817	1.1382e-05	-0.748328	2.60891e-05	-0.153272	0.474588
ETNPPL	turquoise	0.885926	8.57796e-09	0.721961	6.81287e-05	-0.733147	4.59547e-05	-0.337534	0.106735
DDIT4	turquoise	-0.844392	2.13286e-07	-0.67996	0.000256887	0.680092	0.000255906	0.309296	0.141376
C10orf71-AS1	turquoise	-0.881607	1.26442e-08	-0.74353	3.13308e-05	0.607695	0.0016339	0.260268	0.219341
TM4SF1	turquoise	0.879411	1.53127e-08	0.741281	3.4092e-05	-0.682345	0.000239607	-0.408248	0.0476481
SAT1	turquoise	0.838444	3.12951e-07	0.711838	9.57838e-05	-0.538839	0.00659185	-0.457383	0.0246273
EXOG	turquoise	-0.820158	9.29986e-07	-0.807618	1.8339e-06	0.673435	0.000309838	0.204011	0.338971
ADAMTS9	turquoise	0.894654	3.72706e-09	0.671464	0.000327589	-0.599764	0.00194947	-0.391548	0.0584738
ATP1B3	turquoise	0.8685	3.76616e-08	0.695941	0.000159099	-0.572288	0.00347527	-0.48834	0.0154713
PNP	turquoise	0.872162	2.80993e-08	0.737332	3.94636e-05	-0.6779	0.00027268	-0.423018	0.0394406
NR4A1	turquoise	0.856416	9.3398e-08	0.733279	4.57353e-05	-0.712409	9.39958e-05	-0.363489	0.0808192
RARRES1	turquoise	0.832127	4.62568e-07	0.798246	2.95295e-06	-0.629781	0.000974363	-0.210523	0.323439
CHAC2	turquoise	0.769772	1.09282e-05	0.664057	0.000402436	-0.759881	1.65055e-05	-0.266835	0.207511
PDE7A	turquoise	-0.893831	4.04425e-09	-0.753276	2.15083e-05	0.658394	0.000469261	0.287837	0.172598
RGCC	turquoise	-0.830172	5.20352e-07	-0.788297	4.76969e-06	0.605746	0.0017071	0.281259	0.183061
PRELP	turquoise	-0.754914	2.0157e-05	-0.667181	0.000369241	0.799949	2.71308e-06	0.298233	0.156923
ARRDC2	turquoise	-0.870582	3.19187e-08	-0.75397	2.09261e-05	0.605748	0.00170704	0.221748	0.297698
USP53	turquoise	-0.810097	1.60982e-06	-0.744172	3.05797e-05	0.792463	3.9142e-06	0.301332	0.152452
RDH10	turquoise	0.821465	8.63845e-07	0.837336	3.35551e-07	-0.60144	0.00187879	-0.273466	0.196011
MICALL1	turquoise	0.748621	2.57954e-05	0.773302	9.38669e-06	-0.641482	0.000729116	-0.391264	0.0586725
PTGIS	turquoise	0.836867	3.45548e-07	0.672549	0.00031771	-0.67186	0.000323957	-0.341896	0.101999
GABRB1	turquoise	-0.736238	4.10769e-05	-0.617084	0.00131769	0.697573	0.000151245	0.140047	0.513955
RNF125	turquoise	-0.753113	2.16474e-05	-0.612691	0.00145842	0.61196	0.00148304	0.445106	0.0292912
ABRA	turquoise	0.888669	6.65005e-09	0.710223	0.000101001	-0.502969	0.012239	-0.290789	0.168041
RAB11FIP1	turquoise	-0.800364	2.65723e-06	-0.722198	6.75764e-05	0.582829	0.00280061	0.408278	0.0476303
ADAMTS1	turquoise	0.854824	1.04626e-07	0.76053	1.60745e-05	-0.643448	0.000693621	-0.301147	0.152717
SELE	turquoise	0.779009	7.29903e-06	0.801224	2.54494e-06	-0.556694	0.00472217	-0.278856	0.186989
WFDC1	turquoise	0.713658	9.01876e-05	0.723658	6.42551e-05	-0.58655	0.00259065	-0.511029	0.0107102
SOCS3	turquoise	0.841621	2.55482e-07	0.740885	3.45998e-05	-0.670149	0.000339915	-0.197274	0.355501
LOC285556	turquoise	0.785554	5.41979e-06	0.613045	0.00144661	-0.523448	0.00866567	-0.318718	0.129028
RRAD	turquoise	0.872555	2.72154e-08	0.683917	0.000228776	-0.610748	0.00152466	-0.314003	0.135106
ARL4A	turquoise	0.840845	2.68576e-07	0.674684	0.000299023	-0.456298	0.0250137	-0.450416	0.0271944
MUM1L1	turquoise	-0.781661	6.47732e-06	-0.627231	0.00103636	0.651828	0.000558581	0.430682	0.0356456
UGCG	turquoise	0.85604	9.59498e-08	0.792905	3.83206e-06	-0.483197	0.0167613	-0.314953	0.133865
TMEM71	turquoise	-0.846267	1.88388e-07	-0.632377	0.00091459	0.577261	0.0031416	0.274331	0.194544
P2RY2	turquoise	0.744263	3.04746e-05	0.609248	0.00157753	-0.756782	1.87075e-05	-0.183652	0.390332
ISG20	turquoise	0.694189	0.000167924	0.617354	0.00130941	-0.669008	0.000350945	-0.48551	0.0161707
LDLR	turquoise	0.849336	1.53197e-07	0.686078	0.000214583	-0.565446	0.00398295	-0.188936	0.376598
SLC2A12	turquoise	-0.811147	1.52255e-06	-0.560836	0.00435908	0.533375	0.00727459	0.37703	0.0693463
C1QTNF7	turquoise	-0.753707	2.11451e-05	-0.628354	0.00100866	0.734979	4.30061e-05	0.372851	0.0727459
FCN3	turquoise	0.722506	6.68637e-05	0.508699	0.011135	-0.645879	0.00065182	-0.625663	0.00107611
LRRN4CL	turquoise	0.793716	3.68519e-06	0.758762	1.72725e-05	-0.602293	0.00184365	-0.233754	0.271618
ABAT	turquoise	-0.805888	2.0062e-06	-0.701897	0.000132047	0.532188	0.00743038	0.257038	0.22532
ANGPT2	turquoise	0.789496	4.50786e-06	0.667193	0.000369112	-0.581649	0.00287012	-0.404161	0.0501399
RASD1	turquoise	-0.759432	1.68098e-05	-0.76748	1.2045e-05	0.595159	0.00215551	0.161985	0.449522
FAM69C	turquoise	-0.775412	8.5602e-06	-0.792598	3.88901e-06	0.475238	0.0189295	0.143324	0.504056
PARM1	turquoise	-0.790855	4.2267e-06	-0.777874	7.6777e-06	0.520932	0.00905127	0.110232	0.608117
BATF3	turquoise	0.77672	8.08087e-06	0.614536	0.00139783	-0.668002	0.000360918	-0.358593	0.0853016
NGFR	turquoise	0.735857	4.16522e-05	0.670498	0.000336612	-0.552384	0.00512665	-0.4485	0.0279367
TFPI2	turquoise	0.74841	2.60063e-05	0.678584	0.000267345	-0.570402	0.00360939	-0.405443	0.0493476
SLC22A4	turquoise	0.792925	3.82825e-06	0.730384	5.07379e-05	-0.423565	0.0391593	-0.284644	0.177624
NAMPT	turquoise	0.874334	2.35182e-08	0.634172	0.000875116	-0.537526	0.00675077	-0.306185	0.145631
IL6	turquoise	0.809521	1.65959e-06	0.652613	0.000547185	-0.568093	0.00377956	-0.467638	0.0212073
APLNR	turquoise	0.701132	0.000135279	0.716717	8.14253e-05	-0.744254	3.04849e-05	-0.157021	0.463717
LPP-AS2	turquoise	-0.767851	1.18578e-05	-0.50394	0.0120458	0.633452	0.000890768	0.542312	0.00618641
P2RY13	turquoise	-0.798167	2.9644e-06	-0.602672	0.00182821	0.615932	0.00135341	0.0880617	0.682409
AQP3	turquoise	0.758941	1.71477e-05	0.623717	0.00112729	-0.634356	0.000871152	-0.428925	0.0364888
LOC102723722	turquoise	-0.777733	7.726e-06	-0.669664	0.000344562	0.583086	0.00278561	0.120352	0.575365
ASRGL1	turquoise	0.741057	3.43793e-05	0.662616	0.000418605	-0.464404	0.0222414	-0.47796	0.0181636
JUNB	turquoise	0.793594	3.70688e-06	0.641564	0.000727605	-0.617598	0.00130201	-0.303409	0.149506
CXCR4	turquoise	-0.783705	5.90136e-06	-0.498366	0.0131896	0.556961	0.00469807	0.372963	0.0726529
ENAM	turquoise	-0.746366	2.81306e-05	-0.616903	0.00132325	0.643173	0.000698505	0.168347	0.431671
CYP4B1	turquoise	-0.737063	3.98542e-05	-0.78368	5.90822e-06	0.503446	0.0121436	0.29754	0.157937
KRTAP4-7	turquoise	-0.614975	0.00138371	-0.588251	0.00249921	0.682793	0.000236477	0.215005	0.313004
FGFBP3	turquoise	-0.757148	1.8435e-05	-0.64854	0.000608578	0.553438	0.00502516	0.428566	0.0366631
LOC101930071	turquoise	-0.596522	0.00209269	-0.601183	0.00188947	0.624521	0.00110589	0.465537	0.0218746
BHLHE40	turquoise	0.806728	1.92079e-06	0.661918	0.000426638	-0.655395	0.000508393	-0.18904	0.376329
NR4A2	turquoise	0.768896	1.13436e-05	0.598117	0.00202115	-0.574082	0.00335162	-0.424175	0.0388481
C5AR1	turquoise	0.748091	2.63283e-05	0.715482	8.48675e-05	-0.468394	0.0209713	-0.445229	0.0292415
PPAN-P2RY11	turquoise	0.721765	6.8589e-05	0.677412	0.000276543	-0.57944	0.00300418	-0.515427	0.00994486
PLK1	turquoise	0.652885	0.000543275	0.544206	0.00597426	-0.677008	0.000279778	-0.234486	0.270077
SLC2A3	turquoise	0.773148	9.44973e-06	0.645985	0.000650054	-0.66408	0.000402181	-0.171445	0.423116
IGFBP4	turquoise	0.759929	1.64731e-05	0.696271	0.000157481	-0.58238	0.00282687	-0.122541	0.568382
MRGPRF	turquoise	0.705599	0.000117345	0.639047	0.000775209	-0.567035	0.00385975	-0.473769	0.0193536
TNFAIP6	turquoise	0.797219	3.10648e-06	0.747386	2.70521e-05	-0.494029	0.0141401	-0.126504	0.555841
CREM	turquoise	0.830565	5.08254e-07	0.604439	0.00175774	-0.446366	0.0287825	-0.418119	0.0420287
GNA15	turquoise	0.722173	6.76332e-05	0.621925	0.00117622	-0.645059	0.000665668	-0.512767	0.0104022
NR4A3	turquoise	0.862214	6.10543e-08	0.649065	0.000600348	-0.497701	0.0133318	-0.284345	0.1781
RAMP3	turquoise	0.701312	0.000134513	0.664813	0.000394179	-0.643715	0.000688918	-0.318086	0.129832
BMP4	turquoise	-0.713378	9.10284e-05	-0.568629	0.00373946	0.59073	0.00237086	0.0495429	0.818174
A2M-AS1	turquoise	-0.790598	4.27863e-06	-0.622206	0.00116844	0.384536	0.0635474	0.245059	0.248436
LOC102724951	turquoise	-0.753293	2.14938e-05	-0.634751	0.000862699	0.625254	0.00108669	0.0788495	0.714192
MAP2	turquoise	-0.720827	7.083e-05	-0.684573	0.000224382	0.652316	0.000551469	0.206872	0.332094
G0S2	turquoise	0.598488	0.00200483	0.667274	0.000368288	-0.663235	0.000411591	-0.313716	0.135482
CYP46A1	turquoise	-0.688313	0.000200716	-0.594899	0.0021677	0.596289	0.00210329	0.0332468	0.877434
LSAMP	turquoise	0.611576	0.00149612	0.537151	0.00679674	-0.679855	0.000257675	-0.299472	0.155126
CR1L	turquoise	0.690591	0.000187395	0.614748	0.001391	-0.686098	0.000214457	-0.258624	0.222371
LOC100507557	turquoise	-0.641741	0.000724343	-0.448524	0.0279271	0.658961	0.000462171	0.246217	0.246137
LIF	turquoise	0.764786	1.34864e-05	0.636163	0.000833041	-0.54229	0.00618885	-0.347532	0.0961131
SEMA3A	turquoise	0.649742	0.000589863	0.578776	0.0030455	-0.596737	0.0020829	-0.269078	0.203571
PTGIR	turquoise	0.711893	9.56081e-05	0.588927	0.00246366	-0.680353	0.00025397	-0.301757	0.151847
HIF3A	turquoise	-0.812523	1.41452e-06	-0.740501	3.50993e-05	0.470083	0.0204514	0.146649	0.494109
THBS2	turquoise	0.764495	1.36505e-05	0.661977	0.00042596	-0.397508	0.0544119	-0.225868	0.288579
HAS1	turquoise	0.742381	3.27164e-05	0.608512	0.00160401	-0.594699	0.0021771	-0.399772	0.0529278
CXCL2	turquoise	0.684976	0.000221721	0.638109	0.000793621	-0.641818	0.00072294	-0.308466	0.142503
COPS7B	turquoise	-0.643976	0.000684366	-0.674421	0.000301277	0.499296	0.0129928	0.539579	0.00650364
GFPT2	turquoise	0.804385	2.16755e-06	0.694968	0.000163947	-0.492411	0.0145087	-0.149892	0.484502
VNN1	turquoise	-0.711536	9.67419e-05	-0.490642	0.0149207	0.442861	0.0302159	0.538613	0.00661901
GPAT2	turquoise	0.638715	0.000781691	0.612628	0.00146053	-0.692563	0.000176494	-0.249039	0.240591
S100A8	turquoise	0.758285	1.76092e-05	0.589131	0.00245297	-0.659553	0.000454859	-0.244707	0.249138
FKBP5	turquoise	-0.749547	2.48874e-05	-0.682982	0.000235166	0.588635	0.00247893	0.260887	0.218206
TEAD4	turquoise	0.719413	7.43301e-05	0.693443	0.000171806	-0.390165	0.0594489	-0.292768	0.165033
LOC101926951	turquoise	0.650635	0.000576293	0.642853	0.0007042	-0.46111	0.0233366	-0.266442	0.208206
S100A3	turquoise	0.654482	0.000520846	0.604441	0.00175764	-0.583782	0.00274546	-0.306584	0.145081
RASL11B	turquoise	-0.764491	1.36532e-05	-0.496924	0.0134997	0.708996	0.000105132	0.234313	0.270442
LNX1	turquoise	-0.717581	7.90895e-05	-0.740594	3.49779e-05	0.456274	0.0250222	0.264302	0.212021
ENPP7	turquoise	-0.648072	0.000616003	-0.522395	0.00882534	0.525448	0.00836886	0.207705	0.330106
PLK2	turquoise	0.809489	1.66243e-06	0.638733	0.000781342	-0.487433	0.0156928	-0.226535	0.287119
PDZD7	turquoise	0.637075	0.000814377	0.581394	0.0028853	-0.59886	0.00198853	-0.298176	0.157007
HOGA1	turquoise	-0.746226	2.82812e-05	-0.61601	0.00135097	0.6186	0.0012719	0.0785701	0.715164
KLF8	turquoise	-0.701455	0.000133907	-0.557663	0.00463502	0.472416	0.0197508	0.311784	0.138037
IQUB	turquoise	-0.684083	0.000227654	-0.613427	0.00143397	0.548796	0.0054852	0.139977	0.514167
ALDH1L1-AS2	turquoise	-0.68234	0.000239644	-0.612097	0.0014784	0.590436	0.00238581	0.248726	0.241203
TLR6	turquoise	0.530712	0.00762795	0.458549	0.0242176	-0.561117	0.00433533	-0.416294	0.0430264
LOC105370962	turquoise	0.547785	0.00558994	0.532972	0.00732715	-0.486529	0.0159159	-0.587779	0.00252427
EXOC3-AS1	turquoise	-0.572546	0.00345726	-0.563539	0.0041351	0.636913	0.000817663	0.40226	0.0513331
ABCG2	turquoise	-0.711717	9.61641e-05	-0.60322	0.0018061	0.580093	0.00296402	0.220797	0.299828
GADD45G	turquoise	-0.733118	4.60015e-05	-0.616913	0.00132293	0.597402	0.00205296	0.186748	0.382251
ACSM3	turquoise	-0.728371	5.44931e-05	-0.541218	0.00631178	0.536518	0.00687504	0.15185	0.478747
OGDHL	turquoise	-0.575064	0.00328553	-0.537789	0.00671871	0.60074	0.00190804	0.241577	0.255435
SIK1	turquoise	0.816299	1.15229e-06	0.518511	0.00943577	-0.52597	0.00829286	-0.314302	0.134715
LOC151121	turquoise	0.590993	0.00235758	0.43345	0.0343482	-0.542505	0.00616454	-0.381772	0.065638
MGST1	turquoise	0.703386	0.00012595	0.565471	0.003981	-0.64765	0.000622761	-0.148398	0.488913
ZBTB16	turquoise	-0.706066	0.000115593	-0.697912	0.000149654	0.559635	0.00446186	0.190096	0.37362
ZNF189	turquoise	-0.727444	5.63036e-05	-0.577243	0.00314273	0.612785	0.00145526	0.172415	0.420457
FHL3	turquoise	0.599979	0.00194028	0.566906	0.00386967	-0.602563	0.00183264	-0.435706	0.0333189
SLC26A9	turquoise	-0.768035	1.1766e-05	-0.648669	0.000606538	0.35566	0.0880747	0.297531	0.15795
ACTRT3	turquoise	0.646287	0.000645026	0.621578	0.00118591	-0.545294	0.00585511	-0.163607	0.444933
ADM	turquoise	-0.563431	0.00414381	-0.69495	0.000164035	0.601581	0.00187296	0.124307	0.562779
TCIRG1	turquoise	0.621186	0.00119694	0.621751	0.00118106	-0.650962	0.00057139	-0.0154554	0.942858
LOC400043	turquoise	0.610854	0.00152097	0.568577	0.00374337	-0.422118	0.0399063	-0.404123	0.0501637
TNFRSF11B	turquoise	0.783871	5.85668e-06	0.553123	0.00505526	-0.308843	0.14199	-0.296841	0.158962
FAM43A	turquoise	0.794879	3.48325e-06	0.645964	0.000650408	-0.476823	0.0184805	-0.209367	0.326164
KRTAP4-4	turquoise	-0.600123	0.00193416	-0.507054	0.0114431	0.610158	0.00154524	0.38755	0.061327
AXIN1	turquoise	0.649555	0.000592749	0.617374	0.0013088	-0.532482	0.00739155	-0.319533	0.127998
TMUB1	turquoise	0.586076	0.00261662	0.511324	0.0106573	-0.666517	0.000376084	-0.192834	0.366647
LINC01410	turquoise	0.575386	0.00326408	0.544363	0.0059569	-0.56568	0.00396458	-0.289772	0.169602
MARCKSL1	turquoise	0.68913	0.000195849	0.475583	0.0188309	-0.582845	0.00279965	-0.25456	0.229981
HPR	turquoise	-0.665081	0.000391277	-0.639674	0.000763114	0.443981	0.0297516	0.19676	0.356779
DDC	turquoise	-0.605208	0.00172779	-0.586718	0.0025815	0.588396	0.00249152	0.302654	0.150572
LOC400692	turquoise	-0.619035	0.001259	-0.519548	0.00926938	0.523446	0.00866598	0.383261	0.0645057
LRRC17	turquoise	-0.713551	9.05069e-05	-0.368669	0.0762722	0.524303	0.00853775	0.35796	0.0858943
FAM212B-AS1	turquoise	-0.545286	0.00585603	-0.507717	0.011318	0.491628	0.0146899	0.352037	0.0915933
TMEM63C	turquoise	0.66023	0.000446619	0.527983	0.00800493	-0.559667	0.00445915	-0.0467021	0.828445
LOC101927929	turquoise	0.560617	0.0043777	0.435376	0.033468	-0.556242	0.00476325	-0.322594	0.124182
H2AFB1	turquoise	-0.513372	0.0102966	-0.525023	0.00843128	0.407533	0.0480773	0.576493	0.00319127
UNC5B-AS1	turquoise	0.642723	0.000706526	0.491239	0.0147807	-0.561594	0.00429525	-0.327129	0.118681
CD38	turquoise	0.551177	0.00524494	0.540491	0.00639636	-0.431905	0.0350675	-0.257151	0.225109
PDE4B	turquoise	0.732186	4.75718e-05	0.591263	0.00234404	-0.529199	0.0078351	-0.309666	0.140876
IP6K3	turquoise	-0.680624	0.000251974	-0.667782	0.000363124	0.524546	0.00850167	0.0342242	0.873859
FKBPL	turquoise	0.530857	0.00760841	0.486272	0.01598	-0.550413	0.00532112	-0.326187	0.119809
C9orf62	turquoise	-0.571924	0.00350084	-0.570481	0.00360371	0.38267	0.0649532	0.601624	0.00187114
STAM-AS1	turquoise	-0.534078	0.00718357	-0.482417	0.0169645	0.540328	0.00641541	0.23572	0.267492
SLC5A11	turquoise	-0.510945	0.0107253	-0.45001	0.0273502	0.457952	0.0244265	0.539353	0.00653048
XCL2	turquoise	0.581421	0.00288373	0.49061	0.0149284	-0.510764	0.0107577	-0.224014	0.29266
SLC5A6	turquoise	0.596608	0.00208877	0.446632	0.0286758	-0.465183	0.0219887	-0.374889	0.0710728
DTX1	turquoise	0.590159	0.00239994	0.445305	0.0292102	-0.586843	0.00257468	-0.39628	0.0552302
CHI3L1	turquoise	0.684828	0.000222698	0.642527	0.000710065	-0.485869	0.0160806	-0.0163365	0.939606
FAM222A	turquoise	0.527415	0.00808532	0.50489	0.0118593	-0.538171	0.00667227	-0.38704	0.0616982
MYH6	turquoise	0.451609	0.0267402	0.39346	0.057146	-0.582969	0.00279241	-0.386729	0.0619258
SLC25A25	turquoise	0.59148	0.00233318	0.595163	0.00215533	-0.330101	0.115173	-0.398627	0.0536742
CSF2	turquoise	-0.534656	0.00710941	-0.550405	0.00532186	0.477296	0.0183483	0.368239	0.0766425
LOC101926943	turquoise	-0.550438	0.00531854	-0.373776	0.0719829	0.481812	0.0171232	0.289464	0.170076
CCDC172	turquoise	0.576488	0.00319163	0.498673	0.0131244	-0.42412	0.0388759	-0.444097	0.029704
NBL1	turquoise	0.668268	0.000358251	0.544919	0.00589589	-0.376228	0.0699896	-0.385842	0.0625775
IDO1	turquoise	0.549277	0.00543589	0.526647	0.00819506	-0.544871	0.00590114	-0.439128	0.0318049
ARHGEF19	turquoise	0.640311	0.000750971	0.440128	0.0313729	-0.55806	0.00459975	-0.445598	0.0290918
PRAME	turquoise	0.562392	0.00422895	0.538193	0.00666967	-0.501054	0.0126274	-0.146152	0.495588
NCF1C	turquoise	-0.522484	0.00881174	-0.42456	0.0386525	0.461292	0.0232749	0.56898	0.00371339
IL17RB	turquoise	0.641136	0.000735516	0.607842	0.00162849	-0.497197	0.0134404	-0.145408	0.497809
LRFN1	turquoise	-0.669117	0.000349876	-0.564464	0.00406067	0.382565	0.0650326	0.222979	0.294955
LOC101927824	turquoise	-0.616554	0.00133401	-0.613488	0.00143195	0.521755	0.00892366	0.229798	0.280046
TRIM47	turquoise	0.649536	0.000593042	0.541989	0.00622318	-0.397976	0.0541025	-0.373729	0.0720211
BCDIN3D-AS1	turquoise	-0.548118	0.00555526	-0.469455	0.0206436	0.593094	0.00225377	0.359735	0.08424
YDJC	turquoise	0.571465	0.0035333	0.454137	0.0257979	-0.577792	0.00310764	-0.381332	0.0659759
IL3RA	turquoise	0.60243	0.00183806	0.48002	0.017601	-0.479888	0.0176366	-0.288274	0.171919
LOC101929047	turquoise	-0.672482	0.000318315	-0.441278	0.0308815	0.471949	0.0198895	0.417803	0.0421999
BDKRB2	turquoise	0.604989	0.00173626	0.509252	0.0110328	-0.434266	0.033973	-0.372808	0.0727813
BDNF	turquoise	0.744679	2.99977e-05	0.518797	0.00938968	-0.332881	0.111962	-0.280721	0.183935
ITGA3	turquoise	0.562015	0.00426015	0.522263	0.00884556	-0.431449	0.035282	-0.0918078	0.669629
NFKBIE	turquoise	0.550103	0.00535217	0.553211	0.00504686	-0.254122	0.23081	-0.559749	0.00445206
HLA-DRB4	turquoise	0.714493	8.77161e-05	0.550112	0.0053513	-0.35439	0.0892964	-0.309098	0.141644
CPN1	turquoise	0.548869	0.00547768	0.502334	0.0123665	-0.592107	0.00230204	-0.00834602	0.969126
TLR1	turquoise	0.559753	0.00445172	0.51943	0.00928822	-0.460974	0.0233825	-0.369739	0.0753581
LOC101929529	turquoise	0.523519	0.00865501	0.531484	0.00752411	-0.466567	0.0215453	-0.439059	0.0318349
TMEM2	turquoise	0.597884	0.00203146	0.600963	0.0018987	-0.381368	0.0659476	-0.333897	0.110805
ZNF137P	turquoise	-0.603051	0.00181291	-0.459713	0.0238139	0.465071	0.0220249	0.199454	0.350101
ERICH3-AS1	turquoise	-0.523724	0.00862417	-0.472493	0.0197281	0.438925	0.0318929	0.552362	0.00512876
ELF3	turquoise	0.74914	2.52826e-05	0.516729	0.0097272	-0.462984	0.0227083	-0.0847769	0.693685
CNN1	turquoise	0.637995	0.000795894	0.570998	0.00356653	-0.249363	0.23996	-0.19388	0.364001
LOC100506922	turquoise	-0.607183	0.00165288	-0.512627	0.0104267	0.417268	0.0424913	0.0712433	0.74079
ZDHHC23	turquoise	0.504039	0.0120261	0.488212	0.0155025	-0.485778	0.0161034	-0.256704	0.225944
GAS2L2	turquoise	-0.45086	0.0270247	-0.419292	0.0413973	0.530788	0.0076178	0.2566	0.22614
S100A12	turquoise	0.643829	0.000686928	0.502174	0.0123989	-0.471153	0.0201276	-0.204061	0.338851
BANCR	turquoise	-0.62336	0.00113688	-0.345663	0.0980359	0.620013	0.00123046	0.322871	0.123841
SLC7A5	turquoise	0.675492	0.000292208	0.54422	0.00597272	-0.510899	0.0107335	0.0187527	0.930694
LOC101929694	turquoise	-0.508803	0.0111156	-0.491968	0.0146111	0.416712	0.0427963	0.543288	0.00607632
RNF217-AS1	turquoise	-0.578259	0.00307804	-0.438474	0.0320899	0.538921	0.006582	0.315275	0.133447
EGR3	turquoise	0.635848	0.000839585	0.471161	0.0201254	-0.348273	0.0953583	-0.294533	0.162383
HOPX	turquoise	0.655999	0.000500298	0.439108	0.0318134	-0.388875	0.0603692	-0.366833	0.0778614
SERPINB9P1	turquoise	-0.594365	0.00219283	-0.605229	0.00172698	0.44898	0.0277489	0.345757	0.0979388
SSC5D	turquoise	-0.51291	0.0103771	-0.546855	0.0056877	0.462924	0.0227283	0.421127	0.0404242
MRGPRX4	turquoise	-0.537415	0.00676444	-0.453648	0.025978	0.44415	0.0296821	0.0957125	0.656402
ASTN1	turquoise	-0.457082	0.0247342	-0.376317	0.0699181	0.411729	0.0456032	0.350202	0.0934147
HCP5	turquoise	0.575436	0.00326075	0.512919	0.0103756	-0.428528	0.0366813	-0.249856	0.239
FAM201A	turquoise	-0.626383	0.00105769	-0.410687	0.0462082	0.368469	0.0764448	0.375695	0.070419
ABHD17C	turquoise	-0.626286	0.00106015	-0.527298	0.00810194	0.44513	0.0292815	0.0459054	0.83133
ADIG	turquoise	-0.545636	0.00581805	-0.376607	0.0696854	0.534648	0.00711038	0.560884	0.004355
LINC00626	turquoise	0.572558	0.00345645	0.471292	0.0200859	-0.505049	0.0118282	-0.197545	0.354825
BRE-AS1	turquoise	0.723024	6.56797e-05	0.44429	0.0296246	-0.271225	0.199848	-0.525149	0.00841278
CHSY3	turquoise	0.578981	0.00303267	0.508204	0.011227	-0.401703	0.0516868	-0.361281	0.0828176
C9orf163	turquoise	-0.462629	0.0228263	-0.341319	0.102616	0.46868	0.0208824	0.692985	0.000174233
SLC52A2	turquoise	0.543826	0.00601632	0.457948	0.024428	-0.475453	0.018868	-0.325776	0.120303
CALML5	turquoise	0.586591	0.00258839	0.550182	0.00534424	-0.351017	0.0926024	-0.170001	0.427093
ZFAND2B	turquoise	0.488712	0.0153812	0.39482	0.0562156	-0.541927	0.00623026	-0.221644	0.297931
PRMT5-AS1	turquoise	0.508642	0.0111455	0.548096	0.00555749	-0.306899	0.144648	-0.182189	0.394182
STEAP1	turquoise	0.713621	9.02979e-05	0.605689	0.00170926	-0.308552	0.142386	-0.182492	0.393381
APCS	turquoise	-0.547899	0.00557798	-0.47072	0.0202583	0.453323	0.0260985	0.460393	0.0235806
VAC14-AS1	turquoise	-0.490255	0.0150123	-0.474374	0.019178	0.515145	0.0099925	0.525543	0.00835499
FAM132A	turquoise	-0.478673	0.0179673	-0.339574	0.1045	0.476768	0.0184958	0.467802	0.021156
IFNA4	turquoise	0.472248	0.0198007	0.398365	0.0538465	-0.4837	0.0166314	-0.54043	0.00640343
TEX43	turquoise	0.53083	0.00761208	0.452031	0.0265811	-0.386952	0.0617626	-0.0764069	0.7227
LOC101928100	turquoise	-0.647244	0.000629315	-0.394699	0.0562983	0.491429	0.0147364	0.279507	0.185919
PTGDR2	turquoise	-0.608724	0.00159634	-0.335291	0.109232	0.417232	0.0425112	0.390979	0.0588734
COL28A1	turquoise	0.55641	0.00474802	0.480286	0.0175296	-0.537259	0.00678357	-0.221894	0.297371
LINC00893	turquoise	-0.553364	0.00503219	-0.414078	0.0442624	0.321316	0.125765	0.175044	0.413299
TEX101	turquoise	-0.490806	0.0148823	-0.460036	0.0237027	0.408792	0.0473242	0.33295	0.111883
CCDC184	turquoise	-0.510886	0.0107359	-0.498379	0.0131869	0.433691	0.0342372	0.432803	0.0346479
LINC00658	turquoise	0.540027	0.00645079	0.422755	0.0395764	-0.388463	0.0606662	-0.336206	0.108208
LOC100127972	turquoise	0.533763	0.00722418	0.451757	0.0266843	-0.184188	0.388924	-0.495601	0.0137894
LOC105370832	turquoise	-0.547817	0.00558659	-0.477847	0.0181951	0.468486	0.0209428	0.238719	0.261274
RAB11B-AS1	turquoise	0.50991	0.0109125	0.396163	0.0553089	-0.291056	0.167633	-0.53061	0.0076419
LOC283861	turquoise	-0.535312	0.0070261	-0.364425	0.079983	0.507815	0.0112998	0.365725	0.0788317
INPP5J	turquoise	0.460385	0.0235832	0.422054	0.0399396	-0.406244	0.0488577	-0.249876	0.238963
LOC101927526	turquoise	-0.479288	0.0177995	-0.400168	0.0526716	0.463242	0.0226228	0.406802	0.0485188
SLC12A8	turquoise	0.516783	0.00971835	0.326661	0.11924	-0.543188	0.00608755	-0.314035	0.135064
C10orf71	turquoise	-0.673374	0.000310374	-0.370901	0.0743741	0.28049	0.184311	0.321271	0.125821
LOC107985971	turquoise	-0.465206	0.0219813	-0.347286	0.0963652	0.433614	0.0342724	0.306285	0.145493
NEIL2	turquoise	0.479518	0.0177368	0.330019	0.11527	-0.252451	0.233997	-0.534645	0.00711082
LINC01019	turquoise	0.573384	0.00339925	0.435851	0.0332536	-0.502407	0.0123519	-0.102032	0.635208
HAS2	turquoise	0.617054	0.0013186	0.600859	0.00190305	-0.553919	0.00497938	0.107083	0.618465
LINC00889	turquoise	-0.563102	0.00417062	-0.532253	0.00742172	0.443119	0.0301085	0.156457	0.465342
TIMP4	turquoise	-0.540575	0.00638653	-0.67225	0.000320407	0.380188	0.0668593	0.059433	0.782655
C7orf61	turquoise	-0.46042	0.0235713	-0.395136	0.0560015	0.423183	0.0393555	0.494424	0.0140514
VRTN	turquoise	-0.567962	0.00378942	-0.403075	0.0508191	0.504559	0.0119239	0.348533	0.0950947
PHYHIP	turquoise	0.622175	0.00116929	0.478306	0.0180681	-0.419815	0.0411181	-0.349207	0.0944134
C5orf46	turquoise	-0.58028	0.00295259	-0.570019	0.00363719	0.529015	0.00786064	-0.133622	0.533634
LOC441601	turquoise	0.506268	0.0115927	0.49255	0.0144769	-0.380143	0.0668947	-0.246545	0.245489
SYT8	turquoise	-0.570928	0.0035716	-0.497638	0.0133454	0.447352	0.0283891	0.367825	0.0769999
HIST1H3B	turquoise	-0.434817	0.0337215	-0.402278	0.0513217	0.406247	0.0488561	0.605176	0.00172901
TMEM27	turquoise	-0.580162	0.00295978	-0.356946	0.0868507	0.257861	0.223786	0.476049	0.0186987
SNORA28	turquoise	0.511969	0.0105426	0.502406	0.0123522	-0.509421	0.0110018	-0.277429	0.18935
LOC102723526	turquoise	0.506407	0.0115661	0.470518	0.0203195	-0.44748	0.0283383	-0.23363	0.271882
SATB1-AS1	turquoise	0.476444	0.018587	0.475719	0.0187922	-0.423959	0.038958	-0.00749463	0.972274
LOC102723542	turquoise	0.483017	0.016808	0.500752	0.0126895	-0.39986	0.0528705	-0.348516	0.0951124
LOC729887	turquoise	0.50379	0.0120753	0.447845	0.028194	-0.320742	0.126482	-0.464595	0.0221792
RPTN	turquoise	0.452038	0.0265784	0.4599	0.0237496	-0.411038	0.0460037	-0.239927	0.258796
ZNF501	turquoise	-0.626373	0.00105794	-0.463316	0.0225985	0.34066	0.103325	0.35135	0.0922716
OIP5	turquoise	0.551321	0.00523071	0.488488	0.0154355	-0.429217	0.0363473	-0.204438	0.337939
CNTNAP1	turquoise	0.683141	0.00023407	0.548495	0.00551613	-0.446406	0.0287663	-0.0466749	0.828543
USP2-AS1	turquoise	-0.549039	0.00546028	-0.415871	0.0432603	0.511029	0.0107102	0.137109	0.522911
PCDH19	turquoise	-0.570269	0.00361906	-0.355095	0.0886164	0.540731	0.00636834	0.188088	0.378781
WDR83	turquoise	-0.515982	0.0098517	-0.4977	0.013332	0.34801	0.0956258	0.371415	0.0739428
SLC30A10	turquoise	0.502078	0.0124184	0.36081	0.0832493	-0.363232	0.0810496	-0.162313	0.448592
WBSCR27	turquoise	0.578213	0.00308092	0.550609	0.00530151	-0.432681	0.0347048	-0.0209786	0.92249
LMNTD1	turquoise	0.411043	0.0460005	0.309203	0.141502	-0.400427	0.0525044	-0.386685	0.0619581
TMEM154	turquoise	0.490016	0.015069	0.480618	0.0174404	-0.405121	0.049546	-0.198259	0.353054
LOC101930026	turquoise	-0.500791	0.0126815	-0.450032	0.0273416	0.287181	0.173623	0.367862	0.0769675
LOC100506679	turquoise	-0.534506	0.00712861	-0.495236	0.01387	0.403736	0.0504048	0.298503	0.156531
SHCBP1L	turquoise	-0.56746	0.00382739	-0.399191	0.0533057	0.286644	0.174464	0.373277	0.0723934
SNORD116-21	turquoise	-0.437076	0.0327059	-0.373331	0.0723491	0.380923	0.0662903	0.251769	0.235305
PIWIL4	turquoise	-0.472262	0.0197965	-0.311825	0.137981	0.50236	0.0123613	0.100227	0.641235
PPFIA4	turquoise	-0.522296	0.00884049	-0.512242	0.0104944	0.472868	0.0196174	0.406511	0.0486953
CDC7	turquoise	0.56316	0.00416587	0.566485	0.00390201	-0.342166	0.101712	0.0218531	0.919269
TREM1	turquoise	0.508015	0.0112622	0.503854	0.0120627	-0.228622	0.282583	-0.148705	0.488005
SCGB1A1	turquoise	0.509509	0.0109856	0.397677	0.0543	-0.385667	0.062707	-0.231429	0.276551
PTX3	turquoise	0.599849	0.00194582	0.448801	0.0278191	-0.235882	0.267154	-0.322399	0.124422
FOS	turquoise	0.448749	0.0278392	0.430158	0.0358956	-0.518709	0.00940377	-0.221111	0.299123
SMNP	turquoise	-0.576131	0.00321494	-0.511605	0.0106072	0.312019	0.137724	0.313872	0.135278
FAM169B	turquoise	-0.477883	0.0181851	-0.385492	0.0628368	0.46682	0.021465	0.203992	0.339018
ALDH16A1	turquoise	0.486518	0.0159188	0.393867	0.0568662	-0.245233	0.24809	-0.28508	0.176932
TCTEX1D1	turquoise	0.518837	0.00938325	0.503323	0.0121682	-0.375054	0.0709382	-0.206758	0.332367
BATF2	turquoise	0.407346	0.0481894	0.415357	0.0435458	-0.522928	0.00874421	-0.251349	0.236114
TUBB4A	turquoise	0.493711	0.014212	0.420617	0.0406927	-0.483281	0.0167394	-0.144558	0.500352
LINC01300	turquoise	0.452625	0.0263582	0.425173	0.0383428	-0.430731	0.0356221	-0.202344	0.343018
LOC105378311	turquoise	-0.456124	0.025076	-0.449585	0.0275143	0.311694	0.138155	0.352247	0.0913865
CECR6	turquoise	0.439005	0.0318582	0.456211	0.0250449	-0.343794	0.0999884	-0.412256	0.0452996
LOC101929757	turquoise	0.467803	0.0211557	0.383351	0.0644372	-0.454281	0.0257451	-0.0132592	0.950968
KRTAP5-2	turquoise	-0.509424	0.0110012	-0.466938	0.0214277	0.203346	0.340583	0.408888	0.0472667
GRPR	turquoise	0.476049	0.0186987	0.421863	0.0400393	-0.480449	0.0174858	-0.190749	0.371949
NAALADL2	turquoise	-0.436624	0.0329073	-0.393567	0.0570725	0.363419	0.0808818	0.552869	0.00507971
CAPSL	turquoise	0.527963	0.00800788	0.371503	0.0738685	-0.394353	0.0565335	-0.16754	0.433913
CHRNB4	turquoise	0.449343	0.027608	0.331382	0.113685	-0.42684	0.0375101	-0.394535	0.0564094
LOC101929717	turquoise	0.524364	0.00852875	0.424148	0.0388617	-0.402211	0.0513638	-0.0021597	0.992009
FGF14-IT1	turquoise	-0.463609	0.022502	-0.440065	0.0313999	0.455316	0.0253677	0.283574	0.17933
TMEM132C	turquoise	-0.558319	0.00457683	-0.384515	0.0635635	0.188437	0.377883	0.477441	0.0183078
LOC727944	turquoise	0.452236	0.0265041	0.454967	0.0254945	-0.481084	0.0173161	-0.323693	0.122832
TIGIT	turquoise	0.595897	0.00212129	0.362497	0.0817128	-0.336304	0.108098	-0.326898	0.118957
LINC01619	turquoise	-0.505052	0.0118276	-0.354669	0.0890274	0.39016	0.059452	0.439348	0.0317092
FUT5	turquoise	-0.442851	0.0302199	-0.448481	0.027944	0.306988	0.144525	0.452154	0.0265349
TSPAN8	turquoise	-0.514947	0.0100262	-0.348362	0.0952681	0.404331	0.0500342	0.413343	0.0446784
LOC101928917	turquoise	-0.496075	0.013685	-0.383296	0.064479	0.520812	0.00907012	0.279799	0.185441
LINC00485	turquoise	0.386136	0.0623609	0.259208	0.221291	-0.417899	0.0421478	-0.481705	0.0171516
GLDC	turquoise	-0.361635	0.0824947	-0.485175	0.0162552	0.393156	0.0573553	0.21758	0.307102
LOC284240	turquoise	0.470576	0.0203018	0.219105	0.303642	-0.348317	0.0953137	-0.253329	0.232319
ZNRF2P1	turquoise	0.476467	0.0185806	0.478372	0.0180501	-0.265463	0.209946	-0.398679	0.0536401
LOC100506123	turquoise	-0.505128	0.0118128	-0.354224	0.0894574	0.350618	0.0929993	-0.0414306	0.847574
HCRT	turquoise	0.415352	0.0435483	0.324623	0.121699	-0.449165	0.0276771	-0.0863936	0.688127
LOC101927018	turquoise	-0.463719	0.0224658	-0.392438	0.0578525	0.219581	0.302565	0.513011	0.0103594
CHAF1B	turquoise	-0.371128	0.0741837	-0.372616	0.0729406	0.197216	0.355644	0.549723	0.00539058
SYNE4	turquoise	0.42833	0.0367778	0.278245	0.187998	-0.307742	0.14349	-0.386523	0.0620766
CFAP54	turquoise	-0.454851	0.0255368	-0.466094	0.0216962	0.354385	0.0893014	0.0657311	0.760248
SPINK5	turquoise	-0.502665	0.0123	-0.286102	0.175316	0.242366	0.253838	0.444893	0.0293782
ZNF571-AS1	turquoise	-0.478862	0.0179155	-0.371821	0.0736023	0.598285	0.00201372	0.0229903	0.915082
EWSAT1	turquoise	0.559086	0.00450954	0.31744	0.130655	-0.381868	0.0655642	-0.37761	0.0688846
GLI1	turquoise	0.523615	0.0086405	0.500598	0.0127213	-0.256482	0.226361	-0.417334	0.0424558
MARC1	turquoise	-0.455132	0.0254345	-0.332473	0.11243	0.336447	0.10794	0.611747	0.00149029
LDHC	turquoise	0.516483	0.00976804	0.364958	0.0795095	-0.280799	0.183808	-0.363993	0.0803678
WASIR2	turquoise	-0.463912	0.0224024	-0.480407	0.017497	0.3351	0.109446	0.241843	0.254896
CREB3L3	turquoise	0.442045	0.0305574	0.296621	0.159286	-0.224978	0.290535	-0.368111	0.0767526
CEP192	turquoise	-0.615419	0.0013696	-0.256892	0.225593	0.189149	0.376048	0.271988	0.198536
LIPI	turquoise	-0.387736	0.061192	-0.287096	0.173756	0.379501	0.0673947	0.231702	0.27597
TMED6	turquoise	0.520309	0.00914897	0.247447	0.243709	-0.334959	0.109605	-0.197135	0.355846
CD1C	turquoise	-0.538448	0.00663884	-0.396208	0.0552785	0.289249	0.170409	0.177022	0.407955
SIPA1	turquoise	0.338977	0.105151	0.233335	0.272504	-0.362477	0.0817306	-0.369098	0.075905
DAPK1-IT1	turquoise	-0.397147	0.0546515	-0.288154	0.172104	0.420595	0.0407044	-0.00548387	0.979711
NAGS	turquoise	0.395662	0.0556458	0.345869	0.0978235	-0.390881	0.0589425	-0.528493	0.00793341
ZNF80	turquoise	-0.480496	0.0174731	-0.347772	0.0958683	0.217958	0.306243	-0.00339503	0.987438
PHF2P1	turquoise	0.457713	0.0245109	0.399507	0.0530995	-0.344721	0.0990164	0.0403493	0.851509
LOC105370622	turquoise	-0.398919	0.0534829	-0.421163	0.0404052	0.4429	0.0301996	0.135306	0.528442
MSTN	turquoise	-0.514769	0.0100564	-0.435794	0.0332795	0.261575	0.21695	0.138114	0.519838
LOC100506107	turquoise	0.490484	0.014958	0.311211	0.138801	-0.471735	0.0199534	0.0241812	0.9107
LINC00167	turquoise	-0.347016	0.0966416	-0.344991	0.0987353	0.386841	0.0618436	0.182958	0.392154
LOC339622	turquoise	0.488286	0.0154844	0.306952	0.144574	-0.372934	0.0726769	-0.162337	0.448525
LOC101928185	turquoise	0.485403	0.0161977	0.33456	0.110055	-0.386378	0.0621834	-0.148705	0.488007
LOC101927391	turquoise	-0.482961	0.0168224	-0.390765	0.059024	0.45526	0.0253881	0.032059	0.881783
FOSL1	turquoise	0.425905	0.0379754	0.325161	0.121046	-0.291006	0.16771	-0.290531	0.168436
LINC01553	turquoise	0.435542	0.033393	0.395394	0.0558265	-0.20258	0.342443	-0.097066	0.65184
